# Supplementary material
Source: PubMed Central journal article supplement (PMC5962959)
Supplement: NIHMS966135-supplement-Supporting_Information.pdf [file NIHMS966135-supplement-Supporting_Information.pdf]

## Supporting Information

**General Chemical Methods:** Solvents and reagents were purchased from commercial suppliers and used without additional purification.  $^1\text{H}$  and  $^{13}\text{C}$  NMR spectra were recorded at 400 MHz and 100 MHz, respectively, in  $\text{DMSO-}d_6$ . Chemical shifts,  $\delta$ , are reported in ppm and coupling constants,  $J$ , are expressed in Hertz (Hz). Abbreviations for peaks are s = singlet, d = doublet, t = triplet, and m = multiplet. High-resolution mass spectrometry was performed using positive mode electrospray ionization methods (ESMS) with a Bruker BioTOF II spectrometer.

**Synthesis of 2-((5-chloro-2-((2-methoxy-4-(1-methylpiperidin-4-yl)phenyl)amino)pyrimidin-4-yl)amino)-*N*-methylbenzenesulfonamide (compound 19):** Commercially available 2-((2-amino-5-chloropyrimidin-4-yl)amino)-*N*-methylbenzenesulfonamide (CAS 761440-11-3, Chemscene) (50.8 mg, 153  $\mu\text{mol}$ ) and commercially available 2-methoxy-4-(1-methylpiperidin-4-yl)aniline (CAS 1124330-14-8, A Chemtek) (68.6 mg, 311  $\mu\text{mol}$ ) were dissolved in 1.0 mL of 0.625 M HCl in dry ethanol in a dry 5 mL vial with a stir bar under nitrogen. The vial was capped and stirred at 120 °C for 6 h. The mixture was poured into an aqueous potassium carbonate solution (10 mL 10%  $\text{K}_2\text{CO}_3$ ) and extracted with ethyl acetate (3 x 20 mL). The organic phase was concentrated and purified by column chromatography on silica gel using dichloromethane-methanol gradient elution (dichloromethane containing 1% triethylamine, gradient 0-10% methanol) to yield **19** as a pale viscous oil, 40 mg, 77  $\mu\text{mol}$ , 50%, with purity of 98%.  $^1\text{H}$  NMR (400 MHz,  $\text{DMSO-}d_6$ )  $\delta$  9.34 (s, 1H), 8.47 (d,  $J=8.3$  Hz, 1H), 8.24 (s, 1H), 8.21 (s, 1H), 7.78 (d,  $J=7.9$  Hz, 2H), 7.61 (d,  $J=8.1$  Hz, 1H), 7.52 (t,  $J=7.8$  Hz, 1H), 7.26 (t,  $J=7.6$  Hz, 1H), 6.92 (s, 1H), 6.77 (d,  $J=8.2$  Hz, 1H), 3.79 (s, 3H), 3.32 (s, 2H), 2.93 (d,  $J=11.1$  Hz, 2H), 2.43 (s, 3H), 2.25 (s, 3H), 2.06 (t,  $J=10.1$  Hz, 2H), 1.80-1.65 (m, 3H).  $^{13}\text{C}$  NMR (100 MHz,  $\text{DMSO-}d_6$ )  $\delta$  158.2, 155.0, 154.9, 150.9, 142.5, 136.3, 133.1, 128.9, 126.6, 126.0, 123.2, 123.0, 122.9, 117.9, 109.8, 104.7, 55.7, 55.5, 45.9, 40.9, 32.8, 28.5. HRMS: calcd for  $\text{C}_{24}\text{H}_{29}\text{ClN}_6\text{NaO}_3\text{S}$  [ $\text{M} + \text{Na}$ ] $^+$ , 539.1608; found 539.1608.

**Compound purity:** The purity of all compounds in **Tables 1-4** was determined by analytical reverse-phase high performance liquid chromatography (HPLC) analysis using a Waters 2695 HPLC (column: Phenomenex Synergi Fusion-RP, 4.0  $\mu\text{m}$ , 4.6 mm x 150 mm); mobile phase gradient starting at 50:50 0.1% TFA in  $\text{H}_2\text{O}:\text{MeOH}$ , gradient to 10:90 0.1% TFA in  $\text{H}_2\text{O}:\text{MeOH}$  over 20 minutes, hold at 10:90 0.1% TFA in  $\text{H}_2\text{O}:\text{MeOH}$  for 4 minutes, reset to 50:50 0.1% TFA in  $\text{H}_2\text{O}:\text{MeOH}$  hold 6 minutes; detector, Waters 2996; injector, automated injector; detection wavelength, 254 nm; flow rate, 1.0 mL/min.; ambient temperature. Purity of compounds >95%.

**Table S1.** Inhibitory potencies of pyrrolopyrimidines at TSSK2 compared to other kinases

| Compound  | GSK ID #    | Kinase | $\text{IC}_{50}$ , nM | Reference                    |
|-----------|-------------|--------|-----------------------|------------------------------|
| <b>10</b> | GSK2163632A | TSSK2  | 22                    | Current study                |
|           |             | IGF-1  | 0.2                   | Compound 28 <sup>[10a]</sup> |
|           |             | GRK1   | 130                   | [10d]                        |
|           |             | GRK2   | 20,000                | [10d]                        |
|           |             | GRK5   | 3200                  | [10d]                        |
|           |             | PKA    | >500,000              | [10d]                        |
| <b>11</b> | GSK2110236A | TSSK2  | 47                    | Current study                |
|           |             | IGF-1  | < 0.2                 | Compound 27 <sup>[10a]</sup> |
|           |             | GRK1   | 630                   | [10d]                        |
|           |             | GRK2   | 20,000                | [10d]                        |
|           |             | GRK5   | 3200                  | [10d]                        |
|           |             | PKA    | >500,000              | [10d]                        |

| Compound          | GSK ID #                    | Kinase    | IC <sub>50</sub> , nM | Reference                                          |
|-------------------|-----------------------------|-----------|-----------------------|----------------------------------------------------|
| 1                 | GSK1220512A                 | TSSK2     | 72                    | Current study                                      |
|                   |                             | IGF-1     | 0.8; 0.9              | Cmpd 25 <sup>[10c]</sup> ; Cmpd 4 <sup>[10a]</sup> |
| 5                 | GSK1326255A                 | TSSK2     | 107                   | Current study                                      |
|                   |                             | IGF-1     | 0.3                   | Compound 9 <sup>[10c]</sup>                        |
|                   |                             | GRK1      | 500,000               | [10d]                                              |
|                   |                             | GRK2      | 7900                  | [10d]                                              |
|                   |                             | GRK5      | 2500                  | [10d]                                              |
|                   |                             | PKA       | >500,000              | [10d]                                              |
| 2                 | Compound 6 <sup>[10a]</sup> | TSSK2     | 150                   | Current study                                      |
|                   |                             | IGF-1     | 1.3                   | Cmpd 26 <sup>[10c]</sup> ; Cmpd 6 <sup>[10a]</sup> |
| 12                | GSK2220400A                 | TSSK2     | 247                   | Current study                                      |
|                   |                             | IGF-1     | 1.3 - 4               | Example 84 <sup>[10f]</sup>                        |
|                   |                             | Insulin R | 0.25-1                | Example 84 <sup>[10f]</sup>                        |
|                   |                             | ALK       | 1.3 - 4               | Example 84 <sup>[10f]</sup>                        |
|                   |                             | GRK1      | 10,000                | [10d]                                              |
|                   |                             | GRK2      | 200,000               | [10d]                                              |
|                   |                             | GRK5      | 6300                  | [10d]                                              |
| 6                 | GSK1173862A                 | TSSK2     | 250                   | Current study                                      |
|                   |                             | IGF-1     | 0.4                   | Compound 8 <sup>[10c]</sup>                        |
| 7                 | GSK2213727A                 | TSSK2     | 280                   | Current study                                      |
|                   |                             | IGF-1     | 0.5                   | Compound 11 <sup>[10b]</sup>                       |
|                   |                             | JNK1      | 1995                  | Compound 11 <sup>[10b]</sup>                       |
| 3                 | GSK1392956A                 | TSSK2     | 1200                  | Current study                                      |
|                   |                             | IGF-1     | 16                    | Compound 32 <sup>[10c]</sup>                       |
| 13 <sup>[a]</sup> | GSK1838705A                 | TSSK2     | 1300                  | Current study                                      |
|                   |                             | IGF-1     | 2                     | [10e]                                              |
|                   |                             | Insulin R | 1.6                   | [10e]                                              |
|                   |                             | ALK       | 0.5                   | [10e]                                              |
|                   |                             | CLK2      | 21                    | [10e]                                              |
|                   |                             | Fes       | 16                    | [10e]                                              |
|                   |                             | MLCK      | 34                    | [10e]                                              |
|                   |                             | IRR       | 49                    | [10e]                                              |
|                   |                             | Fer       | 87                    | [10e]                                              |
|                   |                             | FAK       | 195                   | [10e]                                              |
|                   |                             | CHK2      | 215                   | [10e]                                              |
|                   |                             | TSSK2     | 452                   | [10e]                                              |
| 9                 | GSK1713088A                 | TSSK2     | 1300                  | Current study                                      |
|                   |                             | IGF-1     | 25                    | Compound 9 <sup>[10b]</sup>                        |
|                   |                             | JNK1      | 3981                  | Compound 9 <sup>[10b]</sup>                        |
|                   |                             | GRK1      | 13,000                | [10d]                                              |
|                   |                             | GRK2      | 6300                  | [10d]                                              |
|                   |                             | GRK5      | 2500                  | [10d]                                              |
|                   |                             | PKA       | >500,000              | [10d]                                              |
| 15                | GSK1511931A                 | TSSK2     | 1500                  | Current study                                      |
|                   |                             | IGF-1     | 13                    | Compound 13 <sup>[10a]</sup>                       |
| 14                | GSK2186269A                 | TSSK2     | 4800                  | Current study                                      |
|                   |                             | IGF-1     | 0.8                   | Compound 33 <sup>[10a]</sup>                       |
| 16                | GSK1751853A                 | TSSK2     | 6000                  | Current study                                      |
|                   |                             | IGF-1     | 32                    | Compound 31 <sup>[10b]</sup>                       |

| Compound | GSK ID #    | Kinase | IC <sub>50</sub> , nM | Reference                    |
|----------|-------------|--------|-----------------------|------------------------------|
| 8        | GSK2219385A | JNK1   | 1585                  | Compound 31 <sup>[10b]</sup> |
|          |             | TSSK2  | 14,000                | Current study                |
|          |             | IGF-1  | 63                    | Compound 13 <sup>[10b]</sup> |
|          |             | JNK1   | 10,000                | Compound 13 <sup>[10b]</sup> |

[a] K<sub>D</sub> values for compound 13 (GSK1838705A) binding to 78 kinases have been reported, with affinities ranging from 0.55 nM for ALK to 8500 nM for IRAK1.<sup>[11]</sup>

**Table S2.** Inhibitory potencies of pyrimidines at TSSK2 compared to other kinases

| Compound    | Name                | Kinase            | IC <sub>50</sub> , nM | Reference                      |
|-------------|---------------------|-------------------|-----------------------|--------------------------------|
| 17          | ALK inhibitor 1     | TSSK2             | 31                    | Current study                  |
|             |                     | FAK               | 2                     | Example 3-39 <sup>[13p]</sup>  |
|             |                     | IGF-1R            | 90                    | Example 3-39 <sup>[13p]</sup>  |
| 18          | ALK inhibitor 2     | TSSK2             | 37                    | Current study                  |
|             |                     | FAK               | 5                     | Example 20-06 <sup>[13p]</sup> |
| 35          | Mps1-IN-3           | TSSK2             | 58                    | Current study                  |
|             |                     | MPS1              | 50                    | [13a]                          |
|             |                     | LTK (TYK1)        | 18                    | [a]                            |
|             |                     | IGF-1R            | 26                    | [a]                            |
|             |                     | INSRR (IRR)       | 29                    | [a]                            |
|             |                     | CLK2              | 42                    | [a]                            |
|             |                     | PTK2 (FAK)        | 74                    | [a]                            |
|             |                     | EGFR (ErbB1)      | 289                   | [a]                            |
|             |                     | CLK1              | 443                   | [a]                            |
|             |                     | AURKB (Aurora B)  | 2100                  | [a]                            |
|             |                     | 22 <sup>[b]</sup> | TAE684                | TSSK2                          |
| ALK         | 3.7                 |                   |                       | [12]                           |
| FLT3        | 3; 182              |                   |                       | [12, 13b]                      |
| LRRK2       | 7.8                 |                   |                       | [13c]                          |
| Tie2        | 12                  |                   |                       | [13b]                          |
| InsR        | 43.7; ~10-20        |                   |                       | [12, 13b]                      |
| FGFR-3K650E | 41                  |                   |                       | [12]                           |
| KDR         | 89                  |                   |                       | [12]                           |
| cFes        | 118                 |                   |                       | [13e]                          |
| FAK         | 270                 |                   |                       | [12]                           |
| Tek         | 219                 |                   |                       | [12]                           |
| Syk         | 286                 |                   |                       | [13b]                          |
| TRKB        | 422                 |                   |                       | [13b]                          |
| CDK1/B      | 490                 |                   |                       | [12]                           |
| Bmx         | 600                 |                   |                       | [13b]                          |
| 24          | ALK-IN-1            | TSSK2             | 230                   | Current study                  |
|             |                     | ALK               | 0.07                  | Compound 11L <sup>[13f]</sup>  |
|             |                     | IGF-1R            | 3.2                   | Compound 11L <sup>[13f]</sup>  |
| 25          | Brigatinib; AP26113 | InsR              | 100                   | Compound 11L <sup>[13f]</sup>  |
|             |                     | TSSK2             | 510                   | Current study                  |
|             |                     | ALK               | 0.37                  | Compound 11Q <sup>[13f]</sup>  |
|             |                     | IGF-1R            | 24.9                  | Compound 11Q <sup>[13f]</sup>  |

| Compound | Name                        | Kinase | IC <sub>50</sub> , nM | Reference                     |
|----------|-----------------------------|--------|-----------------------|-------------------------------|
|          |                             | IRE1a  | 66                    | [13g]                         |
| 23       | Ceritinib; LDK378           | InsR   | 196                   | Compound 11Q <sup>[13f]</sup> |
|          |                             | TSSK2  | 610                   | Current study                 |
|          |                             | ALK    | 26                    | Compound 15b <sup>[12]</sup>  |
|          |                             | InsR   | 319.5                 | Compound 15b <sup>[12]</sup>  |
| 34       | AZD3463                     | TSSK2  | 690                   | Current study                 |
|          |                             | IRE1a  | 710                   | [13g]                         |
| 20       | CZC-54252                   | TSSK2  | 750                   | Current study                 |
|          |                             | LRRK2  | 1.28                  | [13h]                         |
| 26       | CTx-0294885                 | TSSK2  | 963                   | Current study                 |
|          |                             | Flt3   | 1                     | [13d]                         |
|          |                             | Src    | 2                     | [13d]                         |
|          |                             | JAK2   | 3                     | [13d]                         |
|          |                             | VEGFR3 | 3                     | [13d]                         |
|          |                             | FAK    | 4                     | [13d]                         |
|          |                             |        |                       |                               |
| 36       | ASP3026                     | TSSK2  | 3800                  | Current study                 |
|          |                             | ALK    | 3.5                   | [13i]                         |
| 30       | TG101209                    | TSSK2  | 6200                  | Current study                 |
|          |                             | JAK-2  | 6                     | [13j]                         |
| 27       | TAE 226                     | BRD4   | 130                   | [13k]                         |
|          |                             | TSSK2  | 7600                  | Current study                 |
|          |                             | FAK    | 17, 7, 5.5            | [13l, 13p, 14]                |
|          |                             | Flt3   | 26                    | [13d]                         |
|          |                             | IGF-1R | ~140                  | [13j]                         |
|          |                             | EGFR   | 326                   | [13m]                         |
|          |                             |        |                       |                               |
| 21       | CZC-25146                   | TSSK2  | 13,000                | Current study                 |
|          |                             | LRRK2  | 4.76                  | [13h]                         |
| 31       | Rociletinib; Co 1686        | TSSK2  | 15,000                | Current study                 |
|          |                             | EGFR   | 91 <sup>[c]</sup>     | [13n]                         |
| 32       | KRCA-0008                   | TSSK2  | 62,000                | Current study                 |
|          |                             | ALK    | 3.9                   | [13o]                         |
| 28       | GSK1576028A;<br>CTx-0152960 | TSSK2  | >100,000              | Current study                 |
|          |                             | Flt3   | 1                     | [13d]                         |
|          |                             | Src    | 2                     | [13d]                         |
|          |                             | JAK2   | 2                     | [13d]                         |
|          |                             | FAK    | 4                     | [13d]                         |
|          |                             | VEGFR3 | 5                     | [13d]                         |

[a] Personal communication, Jinhua Wang and Nathaniel Gray, Harvard University.

[b] K<sub>D</sub> values **22** for binding to 343 kinases have been reported, with affinities ranging from 0.49 to 9700 nM.<sup>[11]</sup>

[c] K<sub>D</sub> value.

**Table S3.** Compound **19** kinase profiling. Compound **19** (100 nM) was tested in a broad panel of 369 kinases for substrate phosphorylation assays in duplicate using 10  $\mu$ M [ $\gamma$ <sup>33</sup>P]ATP at Reaction Biology Corp. Kinases inhibited to a greater extent than TSSK2 are listed

| <b>Kinase</b> | <b>% inhibition (100 nM)</b> |
|---------------|------------------------------|
| GLK/MAP4K3    | 101                          |
| ALK           | 100                          |
| FER           | 100                          |
| FES/FPS       | 100                          |
| IR            | 100                          |
| IRR/INSRR     | 100                          |
| LOK/STK10     | 99                           |
| FAK/PTK2      | 99                           |
| IGF1R         | 99                           |
| TNK1          | 99                           |
| STK22D/TSSK1  | 99                           |
| LRRK2         | 98                           |
| FLT3          | 98                           |
| ROS/ROS1      | 98                           |
| RSK2          | 98                           |
| CAMK2a        | 98                           |
| HPK1/MAP4K1   | 97                           |
| TYK1/LTK      | 97                           |
| ARK5/NUAK1    | 97                           |
| MYO3b         | 96                           |
| RSK3          | 96                           |
| ULK1          | 95                           |
| PYK2          | 95                           |
| CAMK2d        | 95                           |
| SIK2          | 94                           |
| RSK4          | 93                           |
| ULK2          | 90                           |
| PHKg1         | 90                           |
| DDR1          | 90                           |
| FLT4/VEGFR3   | 90                           |
| RSK1          | 89                           |
| MARK4         | 88                           |
| CHK2          | 88                           |
| FMS           | 88                           |
| SNARK/NUAK2   | 87                           |
| ACK1          | 87                           |
| TAOK1         | 86                           |
| SIK1          | 86                           |
| CAMK2b        | 86                           |
| CDK5/p35      | 85                           |
| CLK1          | 85                           |
| MARK2/PAR-1Ba | 84                           |
| MLK1/MAP3K9   | 83                           |
| PDGFRb        | 83                           |
| CDK5/p25      | 83                           |

| Kinase              | % inhibition (100 nM) |
|---------------------|-----------------------|
| TYK2                | 82                    |
| KHS/MAP4K5          | 82                    |
| AXL                 | 81                    |
| FGFR2               | 81                    |
| PKC $\alpha$ /PRKD3 | 80                    |
| FRK/PTK5            | 80                    |
| MARK1               | 80                    |
| PHKg2               | 79                    |
| YES/YES1            | 79                    |
| MARK3               | 79                    |
| JAK3                | 79                    |
| CDK19/cyclin C      | 79                    |
| NEK9                | 77                    |
| BRK                 | 77                    |
| PKD2/PRKD2          | 76                    |
| SYK                 | 75                    |
| PDGFR $\alpha$      | 75                    |
| TSSK2               | 75                    |

**Table S4.** Compound **19** inhibition of off-target kinases and TSSKs. Compound **19** was tested at 10 concentrations using substrate phosphorylation assays in singlicate using 10  $\mu$ M [ $\gamma$ <sup>33</sup>P]ATP at Reaction Biology Corp. Staurosporine was used a reference compound

| Kinase    | Compound 19<br>IC <sub>50</sub> , nM | Staurosporine<br>IC <sub>50</sub> , nM |
|-----------|--------------------------------------|----------------------------------------|
| ALK       | 0.63                                 | 1.7                                    |
| FES       | 0.36                                 | 2.4                                    |
| IRR/INSRR | 0.68                                 | 15                                     |
| FAK       | 6.6                                  | 15                                     |
| TSSK1     | 0.86                                 | 0.036                                  |
| TSSK2     | 40                                   | 3.4                                    |
| TSSK3     | 700                                  | 27                                     |
| TSSK6     | 84,000                               | 320                                    |
